# Supplementary material for: Reductive immobilization of uranium by PAAM–FeS/Fe3O4 magnetic composites
Source: Royal Society of Chemistry journal article supplement (doi:10.1039/c4ew00014e), 2014-11-21
Supplement: c4ew00014e1.pdf [file c4ew00014e1.pdf]

## Supporting Informations

For

### Reductive Immobilization of Uranium by PAAM-FeS/Fe<sub>3</sub>O<sub>4</sub> Magnetic Composites

Dadong Shao<sup>a</sup>, Xiangxue Wang<sup>a</sup>, Jiaying Li<sup>a\*</sup>, Yongshun Huang<sup>a</sup>, Xuemei Ren<sup>a</sup>, Guangshun Hou<sup>b</sup>,  
Xiangke Wang<sup>a,c</sup>

<sup>a</sup> Institute of Plasma Physics, Chinese Academy of Sciences, P.O. Box 1126, 230031 Hefei, P. R. China.

<sup>b</sup> School of Surveying and Land Information Engineering, Henan Polytechnic University.

<sup>c</sup> School for Radiological and interdisciplinary Sciences, Soochow University

D.D. Shao: shaodadong@126.com

X.X. Wang: Xiangxuewang\_1975@163.com

J.X. Li: lijx@ipp.ac.cn

Y.S. Huang: hyshun.pig@gmail.com

X.M. Ren: renxm1985@163.com

G.S. Hou: houguangshun@163.com

X.K. Wang: xkwang@ipp.ac.cn

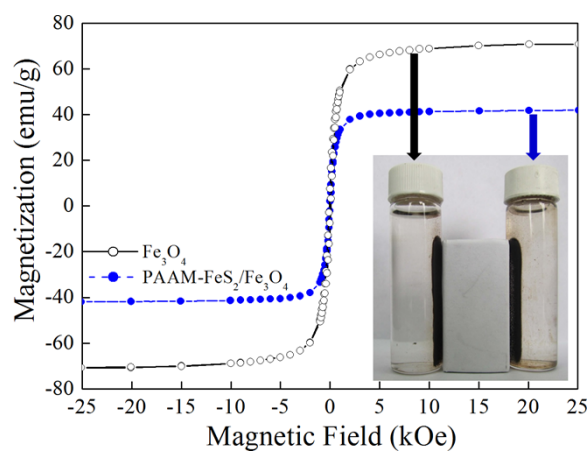

Figure SI-1. Magnetization curve and magnetic separation of PAAM-FeS/Fe<sub>3</sub>O<sub>4</sub>. PAAM-FeS/Fe<sub>3</sub>O<sub>4</sub> particles can be separated from aqueous solution easily with a simple magnet.

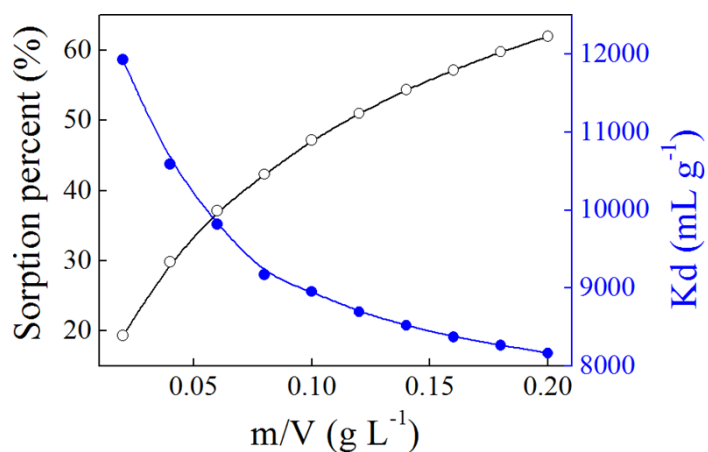

Figure SI-2. Effect of PAAM-FeS/Fe<sub>3</sub>O<sub>4</sub> content on U(VI) enrichment. T = 20 ± 1 °C, contact time: 48 h, C[U(VI)]<sub>(initial)</sub> = 50.0 mg · L<sup>-1</sup>, C[NaCl] = 0.10 mol · L<sup>-1</sup>, pH = 5.0 ± 0.1.

Table SI-1. Comparison of U(VI) sorption capacity of PAAM–FeS/Fe<sub>3</sub>O<sub>4</sub> with other adsorbents.

| Adsorbent                                                 | Experimental conditions | C <sub>smax</sub> (mg/g) | References |
|-----------------------------------------------------------|-------------------------|--------------------------|------------|
| Carbon nanotubes                                          | pH = 5.0, T = 25 °C     | 26.2                     | 1          |
| K <sub>2</sub> MnSn <sub>2</sub> S <sub>6</sub>           | pH = 3.5, T = 25 °C     | 382                      | 2          |
| Hematite                                                  | pH = 5.5, T = 25 °C     | 5.59                     | 3          |
| Akaganeite                                                | pH = 6.0, T = 30 °C     | 90.4                     | 4          |
| Magnetic Fe <sub>3</sub> O <sub>4</sub> @SiO <sub>2</sub> | pH = 6.0, T = 25 °C     | 52                       | 5          |
| MnO <sub>2</sub> coated zeolite                           | pH = 6.0, T = 20 °C     | 17.6                     | 6          |
| Amidoximated hydrogel                                     | pH = 3.0, T = 25 °C     | 39.5                     | 7          |
| Modified carbon CMK-3                                     | pH = 4.0, T = 20 °C     | 75                       | 8          |
| Graphene oxide nanosheets                                 | pH = 5.0, T = 20 °C     | 97.5                     | 9          |
| Quercetin modified Fe <sub>3</sub> O <sub>4</sub>         | pH = 3.7, T = 25 °C     | 12.3                     | 10         |
| PAAM–FeS/Fe <sub>3</sub> O <sub>4</sub>                   | pH = 5.0, T = 20 °C     | 311                      | This work  |

### References

- [1] D. Shao, Z. Jiang, X. Wang, J. Li and Y. Meng, *J. Phys. Chem. B* 2009, 113, 860–864.
- [2] M. J. Manos and M. G. Kanatzidis, *J. Am. Chem. Soc.* 2012, **134**, 16441–16446.
- [3] D. Zhao, X. Wang, S. Yang, Z. Guo and G. Sheng, *J. Environ. Radioact.* 2012, **103**, 20-29.
- [4] S. D. Yusan and S. Akyil, *J. Hazard. Mater.* **2008**, 160, 388-395.
- [5] F. L. Fan, Z. Qin, J. Bai, W. D. Rong, F. Y. Fan, W. Tian, X. L. Wu, Y. Wang and L. Zhao, *J. Environ. Radioact.* 2012, **106**, 40-46.
- [6] R. P. Han, W. H. Zou, Y. Wang and L. Zhu, *J. Environ. Radioact.* 2007, **93**, 127–143.
- [7] N. Seko, A. Katakai, M. Tamada, T. Sugo and F. Yoshii, *Sep. Sci. Technol.* 2004, **39**, 3753–3767.
- [8] J. H. Kim, H. I. Lee, J. W. Yeon, Y. Jung, J. M. Kim, *J. Radioanal. Nuclear Chem.* 2010, **286**, 129–133.
- [9] G. Zhao, T. Wen, X. Yang, S. Yang, J. Liao, J. Hu, D. Shao and X. Wang, *Dalton Trans.* 2012, **41**, 6182–6188.
- [10] S. Sadeghi, H. Azhdari, H. Arabi and A. Z. Moghaddam, *J. Hazard. Mater.* 2012, **215–216**, 208–216.
